# Supplementary material for: Dual-site occupancy induced broadband cyan emission in Ba2CaB2Si4O14:Ce3+
Source: Royal Society of Chemistry journal article supplement (doi:10.1039/d0tc02625e), 2020-01-01
Supplement: d0tc02625e1.pdf [file d0tc02625e1.pdf]

*Supporting Information*

**Dual-Site Occupancy Induced Broadband Cyan Emission in  
 $\text{Ba}_2\text{CaB}_2\text{Si}_4\text{O}_{14}:\text{Ce}^{3+}$**

Shihai You,<sup>a,b</sup> Ya Zhuo,<sup>b</sup> Qiulin Chen,<sup>a</sup> Jakoah Brgoch,<sup>b,\*</sup> and Rong-Jun Xie<sup>a,\*</sup>

<sup>a</sup> *College of Materials, Xiamen University, Xiamen, Fujian 361005, China*

<sup>b</sup> *Department of Chemistry, University of Houston, Houston, Texas 77024, United States*

*Corresponding Authors*

\* jbrgoch@uh.edu (J. Brgoch)

\* rjxie@xmu.edu.cn (R.-J. Xie)

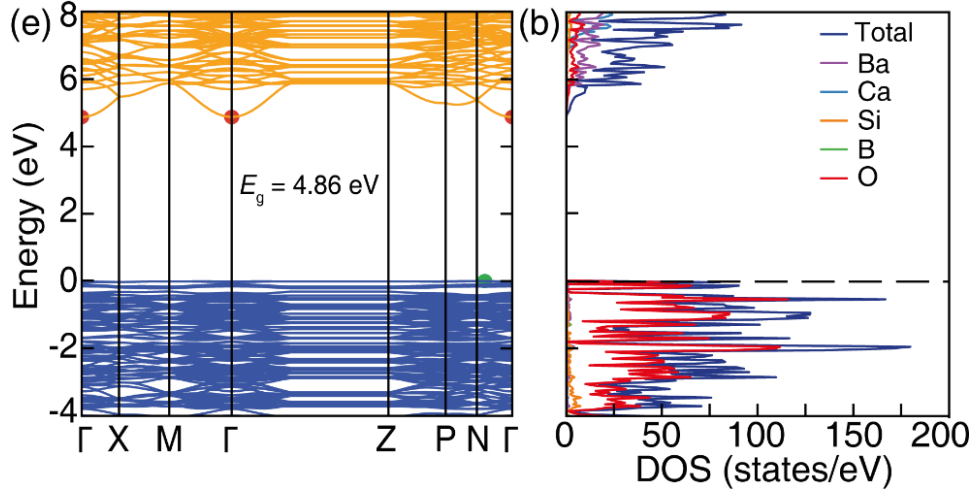

**Figure S1.** (a) The band structure and (b) projected total density of states (DOS) of BCBSO host calculate with the DFT-PBE method.

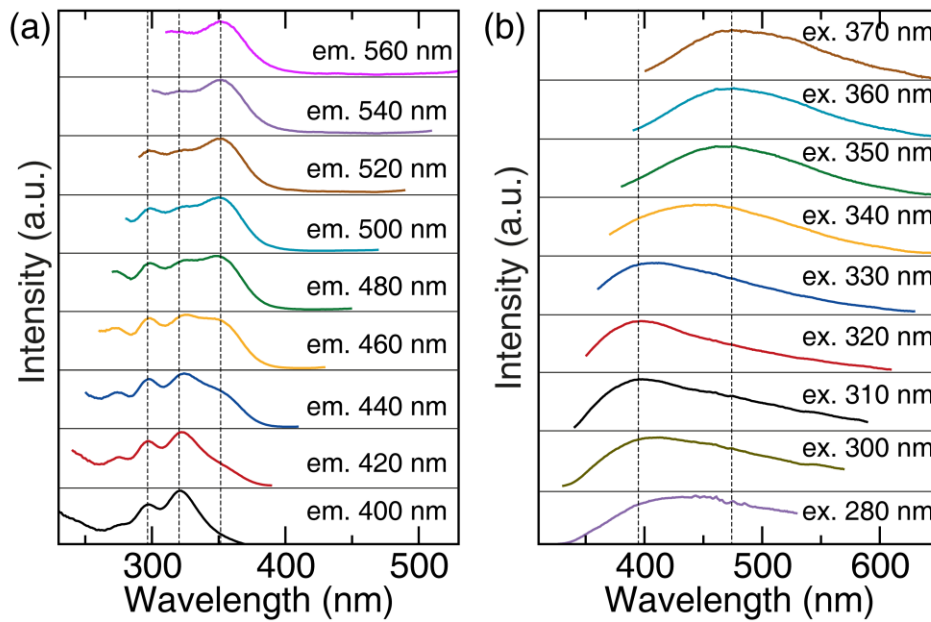

**Figure S2.** (a) Photoluminescence excitation spectra monitored at different emission wavelengths and (b) emission spectra recorded under different excitation wavelengths of BCBSO:0.03Ce<sup>3+</sup>.

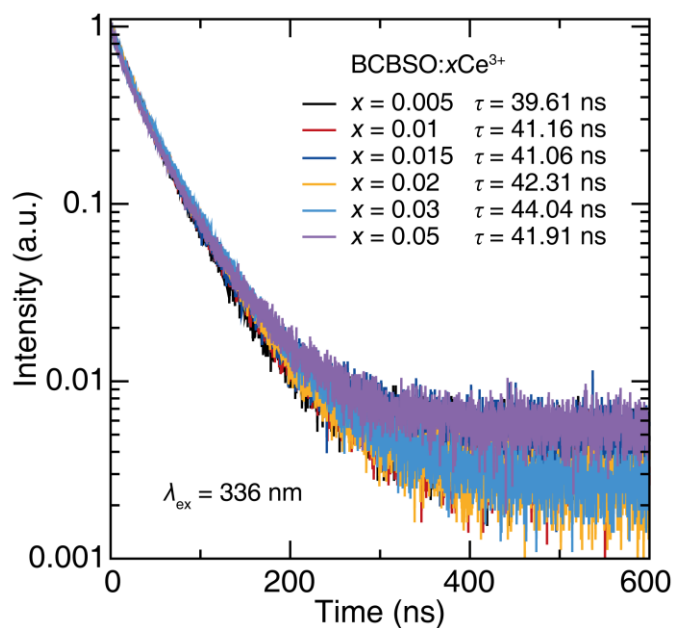

**Figure S3.** Decay curves of BCBSO: $x\text{Ce}^{3+}$  ( $x = 0.005 - 0.05$ ) samples under 336 nm excitation.

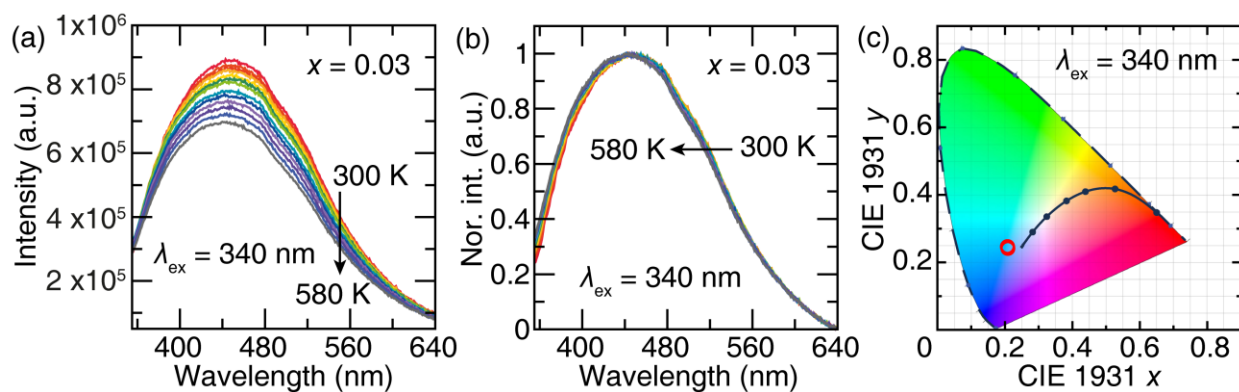

**Figure S4.** (a) Emission spectra, (b) normalized emission spectra, and (c) CIE 1931 chromaticity coordinates of BCBSO:0.03 $\text{Ce}^{3+}$  versus temperature ranging from 300 to 580 K under a 340 nm light excitation.

**Table S1.** Refine atom positions, thermal parameters, and occupancies of Ba<sub>2</sub>CaB<sub>2</sub>Si<sub>4</sub>O<sub>14</sub> from the Rietveld refinement of high-resolution synchrotron XRD data.

| atom | Wyck. pos.  | <i>x</i>   | <i>y</i>   | <i>z</i>   | <i>U</i> <sub>iso</sub> (Å <sup>2</sup> ) | occ. |
|------|-------------|------------|------------|------------|-------------------------------------------|------|
| Ba1  | 8 <i>i</i>  | 0.20563(6) | 0.20563(6) | 0.99925(1) | 0.00964                                   | 1    |
| Ca1  | 4 <i>e</i>  | 0          | 0          | 0.24435(9) | 0.00067                                   | 1    |
| Si1  | 16 <i>j</i> | 0.51415(2) | 0.20096(5) | 0.23648(9) | 0.00403                                   | 1    |
| B1   | 8 <i>g</i>  | 0.50000(0) | 0.33241(9) | 0          | 0.00364                                   | 1    |
| O1   | 8 <i>i</i>  | 0.40626(5) | 0.40626(5) | 0.06633(2) | 0.00186                                   | 1    |
| O2   | 16 <i>j</i> | 0.56000(4) | 0.25457(8) | 0.09906(3) | 0.00055                                   | 1    |
| O3   | 16 <i>j</i> | 0.49488(4) | 0.30236(9) | 0.34550(9) | 0.00471                                   | 1    |
| O4   | 16 <i>j</i> | 0.62426(1) | 0.11044(8) | 0.28914(5) | 0.00516                                   | 1    |

**Table S2.** Emission peaks ( $\lambda_{em}$ ) and the full width at half maximum (FWHM) of BCBSO:0.03Ce<sup>3+</sup> under different excitation wavelengths ( $\lambda_{ex}$ ).

| $\lambda_{ex}$ (nm) | $\lambda_{ex}$ (nm) | FWHM (nm; cm <sup>-1</sup> ) |
|---------------------|---------------------|------------------------------|
| 310                 | 395                 | 146 (8053)                   |
| 320                 | 399                 | 121 (7022)                   |
| 330                 | 410                 | 138 (7624)                   |
| 340                 | 455                 | 161 (8010)                   |
| 350                 | 478                 | 142 (6053)                   |
| 360                 | 479                 | 135 (5792)                   |
| 370                 | 480                 | 133 (5539)                   |

**Table S3.** Luminescent decay component ( $\tau_1$ ,  $\tau_2$ ) and corresponding percentage contributions (%), and the average lifetime ( $\tau_{av}$ ) of BCBSO: $x\text{Ce}^{3+}$  ( $x = 0.005 - 0.05$ ) under 336 nm excitation.

| $x$   | $\tau_1$ (ns) | Percent. (%) | $\tau_2$ (ns) | Percent. (%) | $\tau_{av}$ (ns) | $R^2_{adj}$ |
|-------|---------------|--------------|---------------|--------------|------------------|-------------|
| 0.005 | 21.33         | 42           | 45.85         | 58           | 39.61            | 0.9992      |
| 0.01  | 20.20         | 41           | 47.39         | 59           | 41.16            | 0.9995      |
| 0.015 | 18.80         | 40           | 47.08         | 60           | 41.06            | 0.9992      |
| 0.02  | 18.51         | 38           | 47.96         | 62           | 42.31            | 0.9996      |
| 0.03  | 19.00         | 38           | 49.93         | 62           | 44.04            | 0.9996      |
| 0.05  | 15.07         | 39           | 47.37         | 61           | 41.91            | 0.9991      |

**Table S4.** Color rendering indexes of wLED-1 and wLED-2 using BCBSO:0.03Ce<sup>3+</sup> as cyan phosphor.

| Devices | $R_a$ | $R_1$ | $R_2$ | $R_3$ | $R_4$ | $R_5$ | $R_6$ | $R_7$ | $R_8$ | $R_9$ | $R_{10}$ | $R_{11}$ | $R_{12}$ | $R_{13}$ | $R_{14}$ | $R_{15}$ |
|---------|-------|-------|-------|-------|-------|-------|-------|-------|-------|-------|----------|----------|----------|----------|----------|----------|
| wLED-1  | 91    | 92    | 91    | 89    | 92    | 92    | 88    | 92    | 95    | 96    | 78       | 90       | 85       | 91       | 94       | 95       |
| wLED-2  | 95    | 97    | 97    | 97    | 96    | 97    | 93    | 94    | 90    | 75    | 94       | 91       | 93       | 96       | 98       | 97       |
